# Supplementary material for: Two prolines with a difference: contrasting stereoelectronic effects of 4R/S-aminoproline on triplex stability in collagen peptides [Pro(X)-Pro(Y)-Gly]nElectronic supplementary information (ESI) available: 1H NMR spectra and coupling constant analysis of 3 and 4; synthetic schemes for 3, 4, 5 and 6; FABMS of 3 and 4; MALDI-TOF MS of 5 and 6; HPLC of peptides 5 and 6. See http://www.rsc.org/suppdata/cc/b3/b308581c/
Source: Royal Society of Chemistry journal article supplement (doi:10.1039/b308581c), 2003-01-01
Supplement: b308581c.pdf [file b308581c.pdf]

**Two prolines with a difference: Contrasting stereoelectronic effects  
of 4*R/S*-aminoproline on triplex stability in collagen peptides  
[Pro(X)-Pro(Y)-Gly]<sub>n</sub>**

*M. Umashankara, I. Ramesh Babu and Krishna N. Ganesh \**

Division of Organic Chemistry (Synthesis),

National Chemical Laboratory,

Pune 411008, India

Fax: (91) 20 589 3153

E-mail: [kng@ems.ncl.res.in](mailto:kng@ems.ncl.res.in)

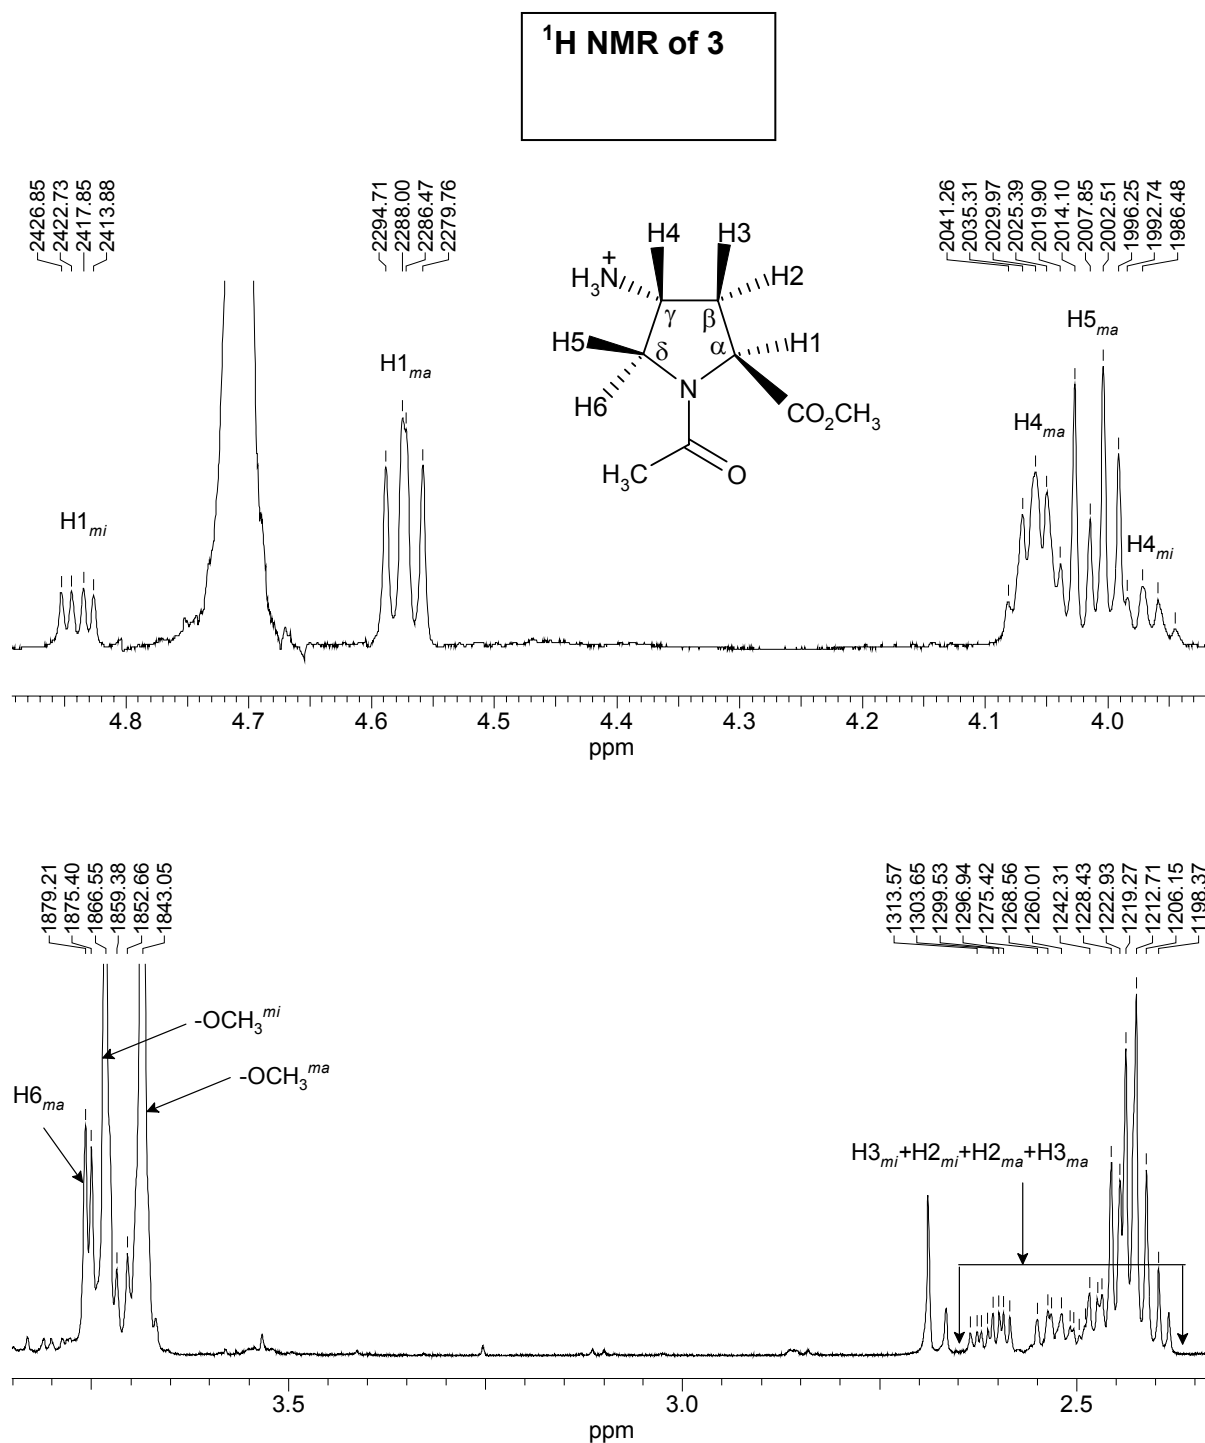

Expanded 500 MHz <sup>1</sup>H-NMR spectrum of Ac-Amp-OMe<sup>+</sup> 3 in D<sub>2</sub>O; *ma* is the major isomer (*Z*) and *mi* is the minor isomer (*E*). Spectrum was recorded on a Bruker-DRX 500 instrument using a 5 mm QNP probe.

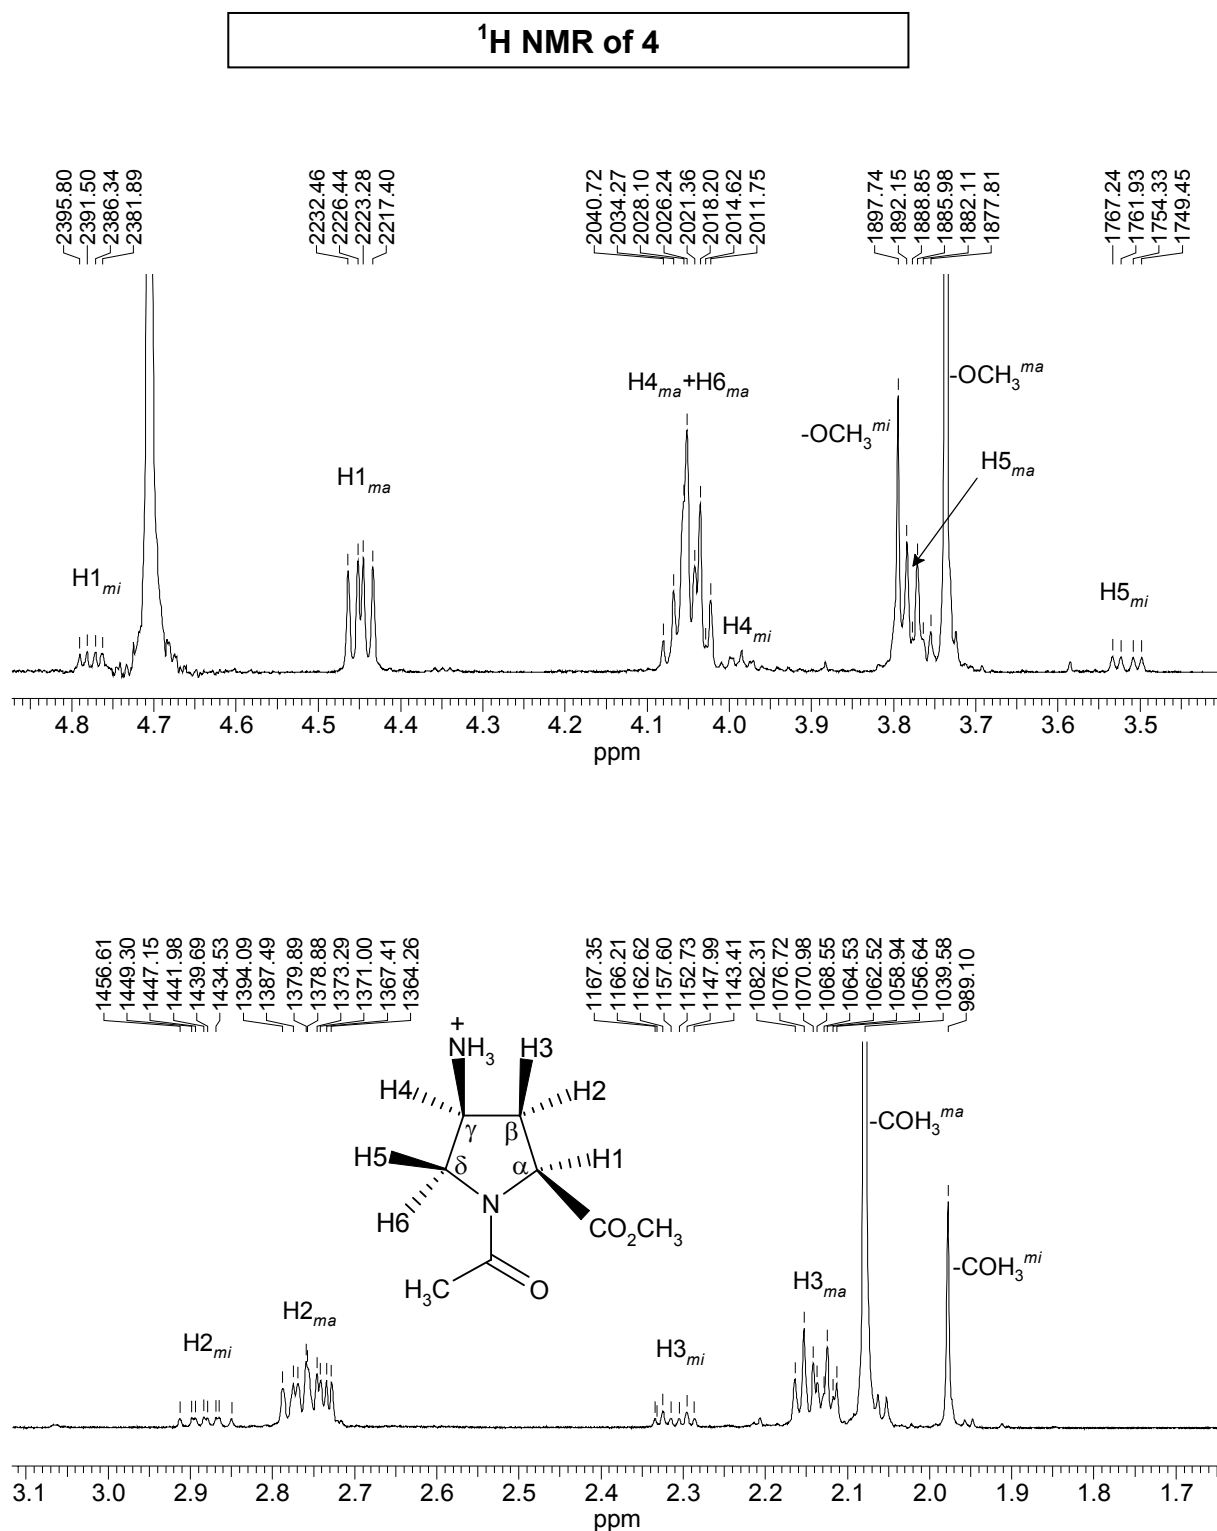

Expanded 500 MHz  $^1\text{H}$ -NMR spectrum of Ac-amp-OMe<sup>+</sup> 4 in D<sub>2</sub>O; *ma* is the major isomer (*Z*) and *mi* is the minor isomer (*E*). Spectrum was recorded on a Bruker-DRX 500 instrument using a 5 mm QNP probe.

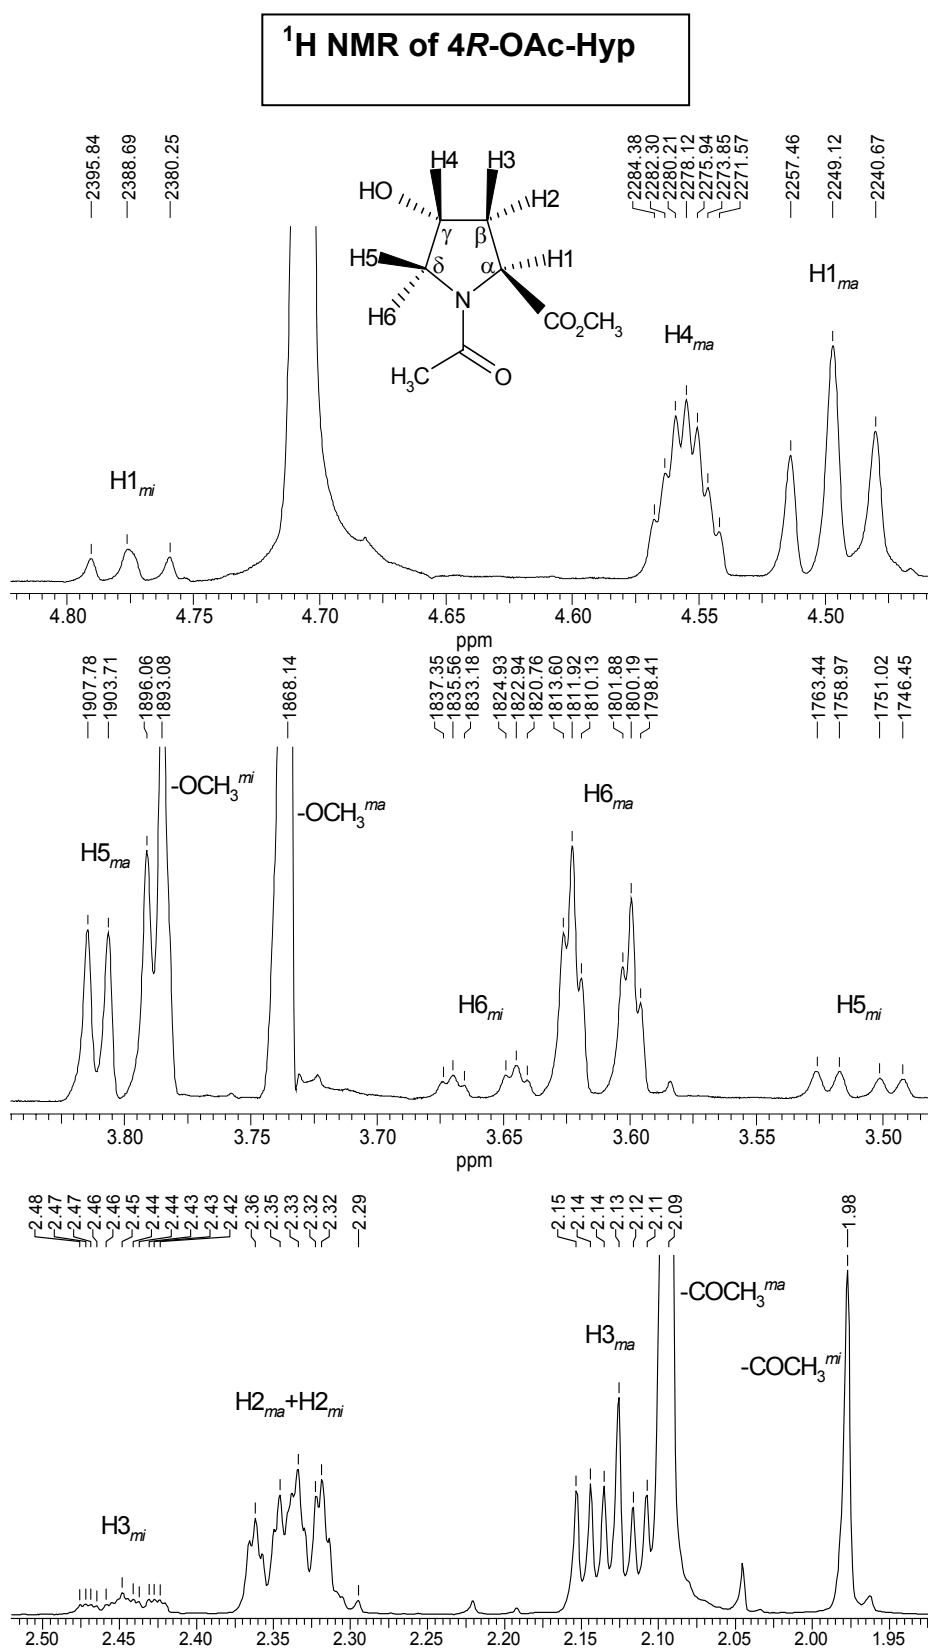

Expanded 500 MHz <sup>1</sup>H-NMR spectrum of Ac-Hyp-OMe in D<sub>2</sub>O. *ma* is the major isomer (*Z*) and *mi* is the minor isomer (*E*). Spectrum was recorded on a Bruker-DRX 500 instrument using a 5 mm QNP probe.

**H<sup>α</sup> regions of the <sup>1</sup>H-NMR spectra**

H<sup>α</sup> regions of the <sup>1</sup>H-NMR spectra of **A** Ac-Hyp-OMe; **B** Ac-Amp-OMe<sup>+</sup> **3**; and **C** Ac-amp-OMe<sup>+</sup> **4**; *ma* is the major isomer (*Z*) and *mi* is the minor isomer (*E*). NMR spectra were recorded in D<sub>2</sub>O at 500 MHz with a 5mm probe.

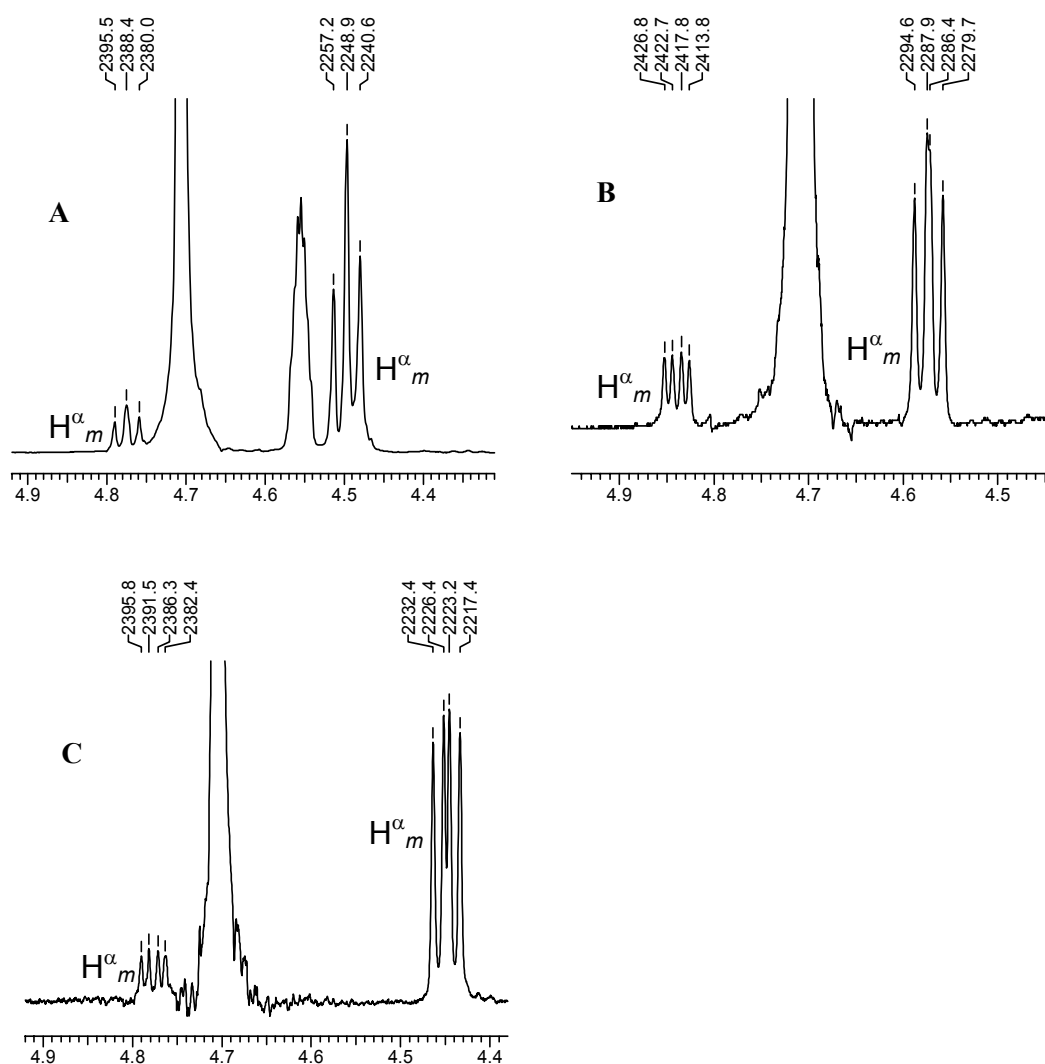

**Analysis of vicinal coupling constants for ring pucker assignments**

Vicinal coupling constants of compounds **3,4** extracted from 500 MHz spectra and the derived pucker type for the pyrrolidine ring

|                                                     | $J_{H-H}$                    |           |           |           |           |                  |           | Derived<br>pucker<br>type |
|-----------------------------------------------------|------------------------------|-----------|-----------|-----------|-----------|------------------|-----------|---------------------------|
|                                                     | Vicinal $J_{H-H}$ values(Hz) |           |           |           |           | W type $J_{H-H}$ |           |                           |
|                                                     | $J_{1-2}$                    | $J_{1-3}$ | $J_{2-4}$ | $J_{3-4}$ | $J_{4-5}$ | $J_{4-6}$        | $J_{2-6}$ |                           |
| $J_{calc}$ for $\gamma$ -exo<br>pucker <sup>a</sup> | 8.10                         | 10.36     | 0.93      | 3.82      | 3.26      | 0.62             |           |                           |
| $J_{cal}$ for $\gamma$ -endo<br>pucker <sup>a</sup> | 10.50                        | 2.80      | 3.85      | 1.10      | 0.81      | 3.42             |           |                           |
| Ac-Hyp-OMe                                          | 7.95                         | 8.74      | 2.38      | 4.37      | 3.97      | 1.59             | 1.99      | $\gamma$ -exo             |
| Ac-Amp-OMe <sup>+</sup> <b>3</b>                    | 6.71                         | 8.24      | --        | --        | 5.95      | 3.82             |           | $\gamma$ -exo             |
| Ac-amp-OMe <sup>+</sup> <b>4</b>                    | 8.95                         | 5.85      | 6.51      | 5.58      | 3.26      | 6.51             |           | $\gamma$ -endo            |

- a) Idealized coupling constants for  $\gamma$ -exo and  $\gamma$ -endo conformation (from reference 8b)  
 b) Obtained from decoupled spectra (see Appendix).

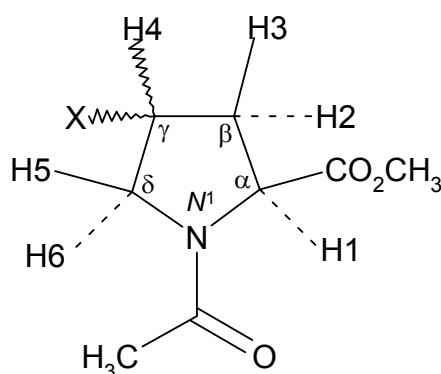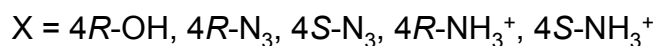

Numbering scheme used to identify the peaks of <sup>1</sup>H-NMR spectra of 4-substituted proline model compounds Ac-Xaa-OMe.

Synthesis of Amp (3) and amp (4) monomers for NMR studies

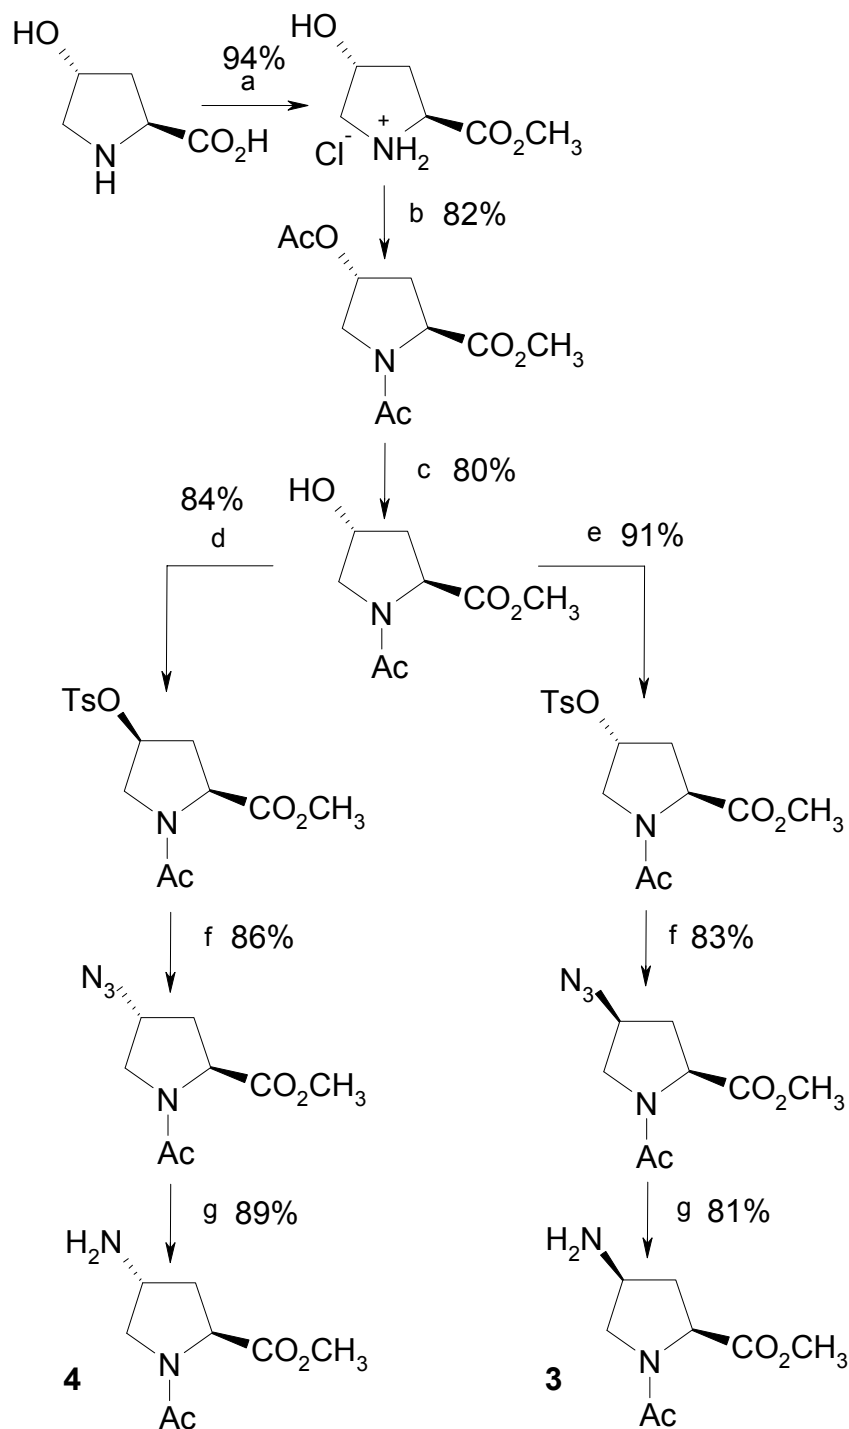

a) MeOH,  $\text{SOCl}_2$ ; b.  $\text{Ac}_2\text{O}$ ; c) MeOH,  $\text{K}_2\text{CO}_3$ ; d)  $\text{PPh}_3$ , DEAD, TsOMe, THF; e) TsCl, pyridine; f)  $\text{NaN}_3$ , DMF at 55 °C; g) Pd-C,  $\text{H}_2$ , MeOH

Synthesis of Monomers 7 and 8

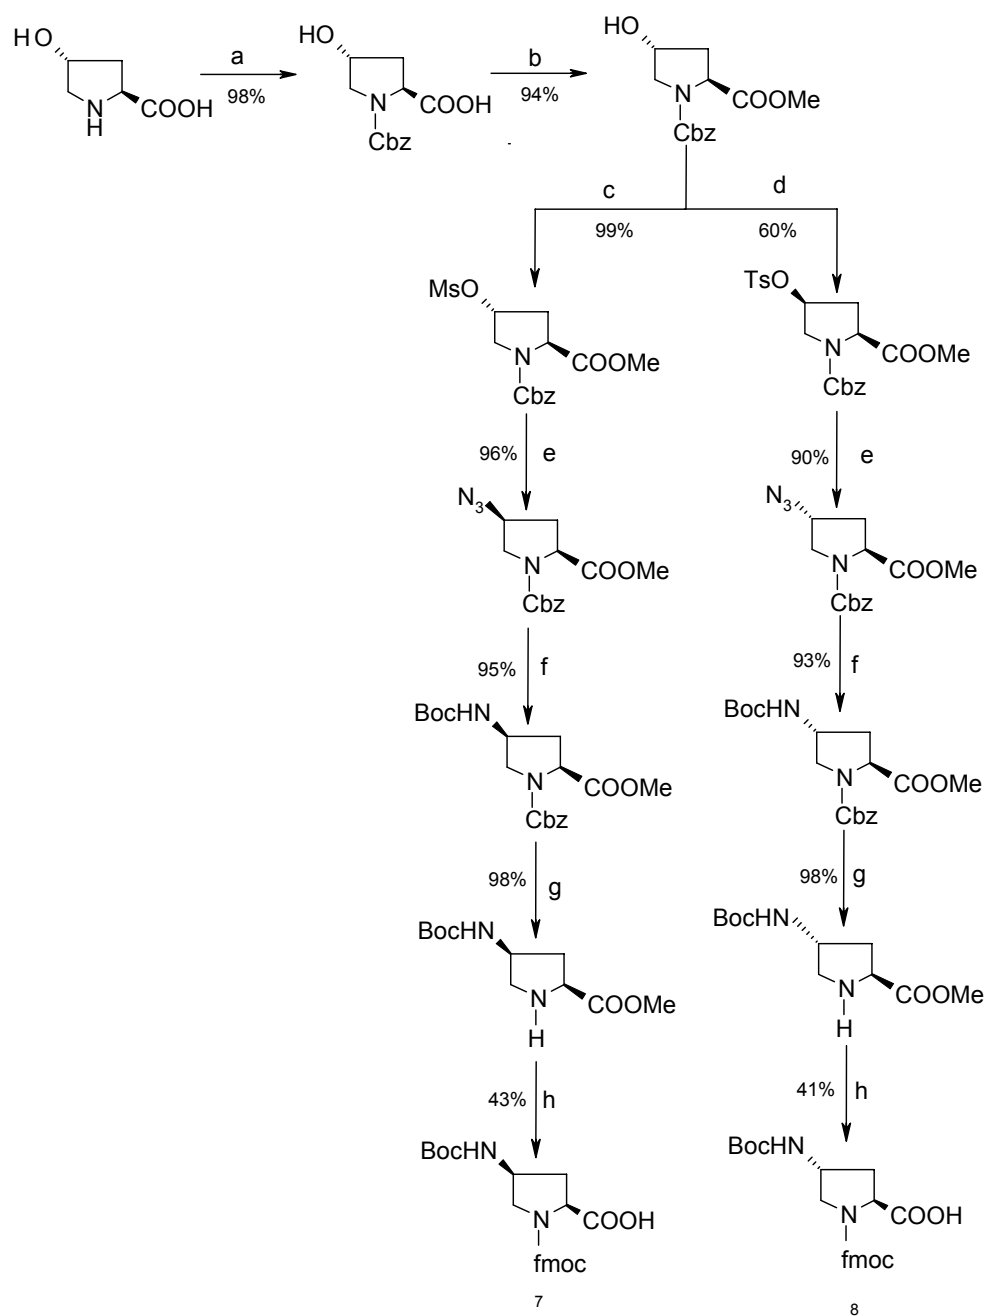

a) NaHCO<sub>3</sub>, CbzCl, H<sub>2</sub>O ; b) MeOH/ SOCl<sub>2</sub> ; c) MsCl / Py ; d) PPh<sub>3</sub>, DIAD, P-Ts OMe, THF ;

e) DMF/ NaN<sub>3</sub> ; f) Raney Ni/H<sub>2</sub>, EtOAc, (Boc)<sub>2</sub>O ; g) 10% Pd/C, MeOH ; h) i) MeOH/NaOH,

ii) Na<sub>2</sub>CO<sub>3</sub>, Fmoc Cl, H<sub>2</sub>O : Dioxan



FAB Mass spectrum of compound 7

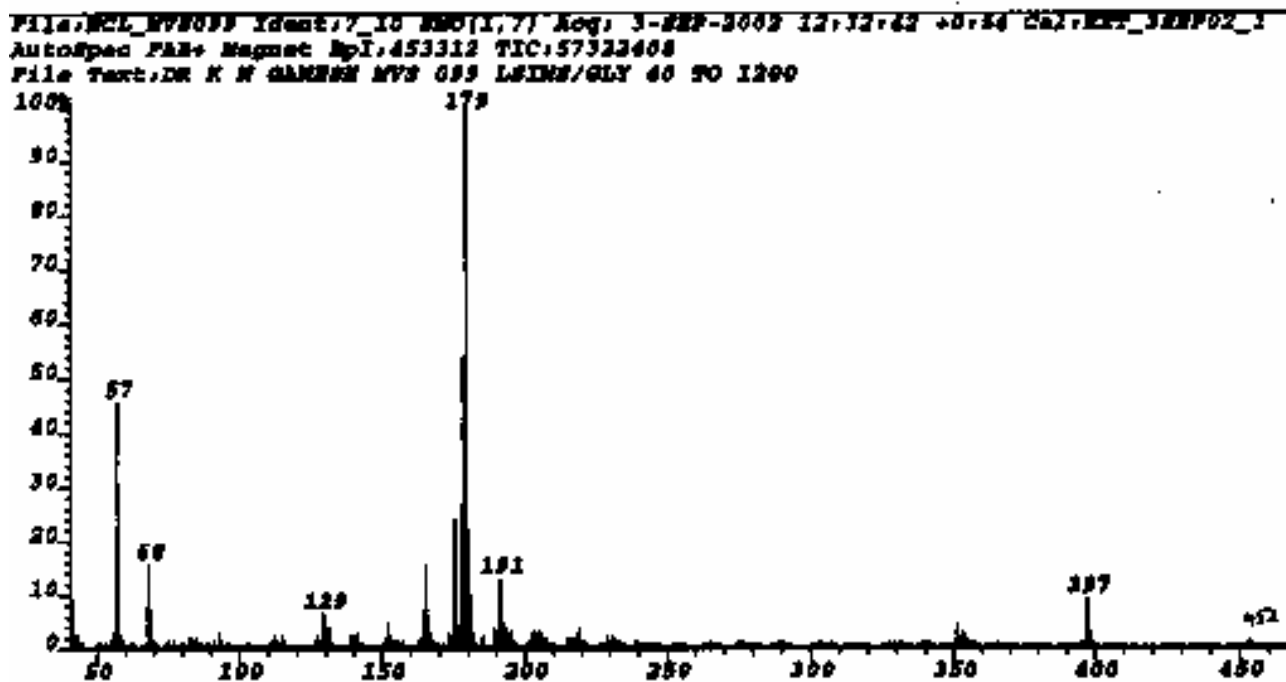

FAB Mass spectrum of compound 8

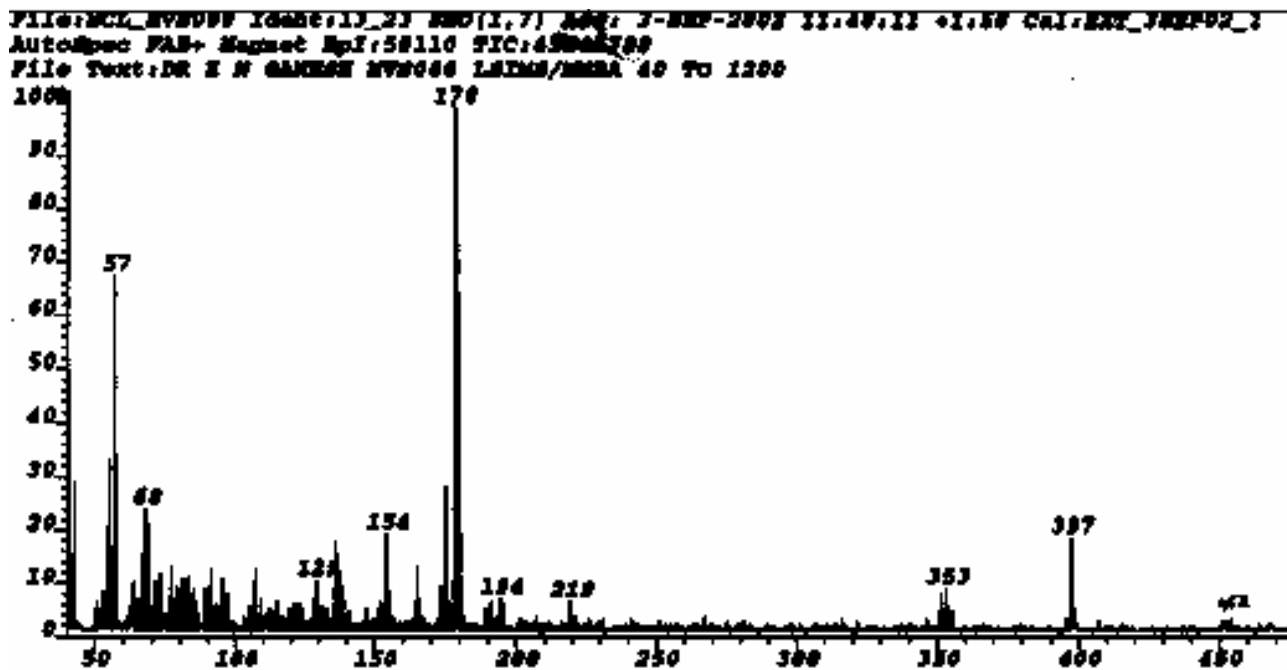

MALDI-TOF Mass spectrum of peptide 5

DR K N GANESH

LC-3

Data: LC30001.15 25 Nov 2002 12:24 Cal: tof 8 Dec 2000 12:00

Kratos PCKompact SEQ V1.2.2: + Linear High, Power: 133, P.Ext. @ 3000 (bln 56)

%Int. 100% = 4.4 mV[sum= 222 mV] Profiles 1-50 Smooth Av 50

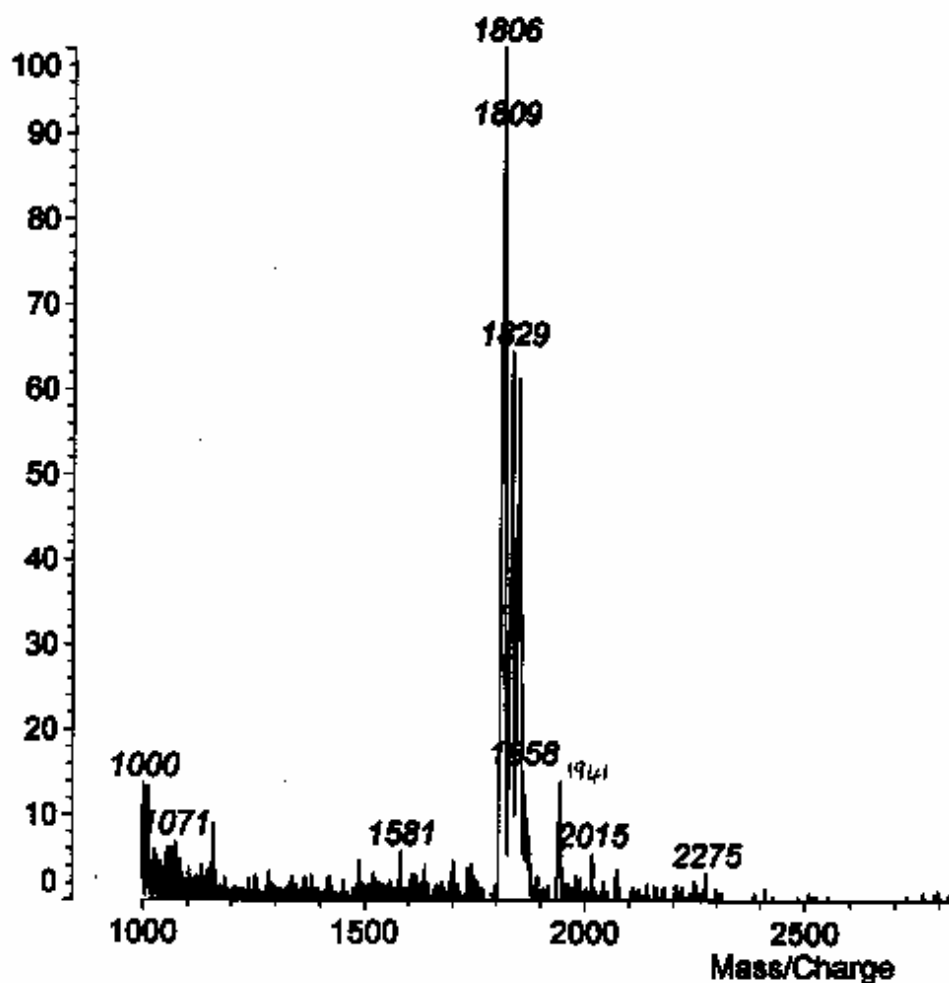

MALDI-TOF Mass spectrum of peptide 6

DR K N GANESH

LC-2

Data: LC20001.14 25 Nov 2002 12:20 Cal: tof 8 Dec 2000 12:00

Kratos PCKompact SEQ V1.2.2: + Linear High, Power: 125, P.Ext. @ 3000 (bin 56)

%Int. 100% = 3.5 mV[sum= 137 mV] Profiles 1-39 Smooth Av 50

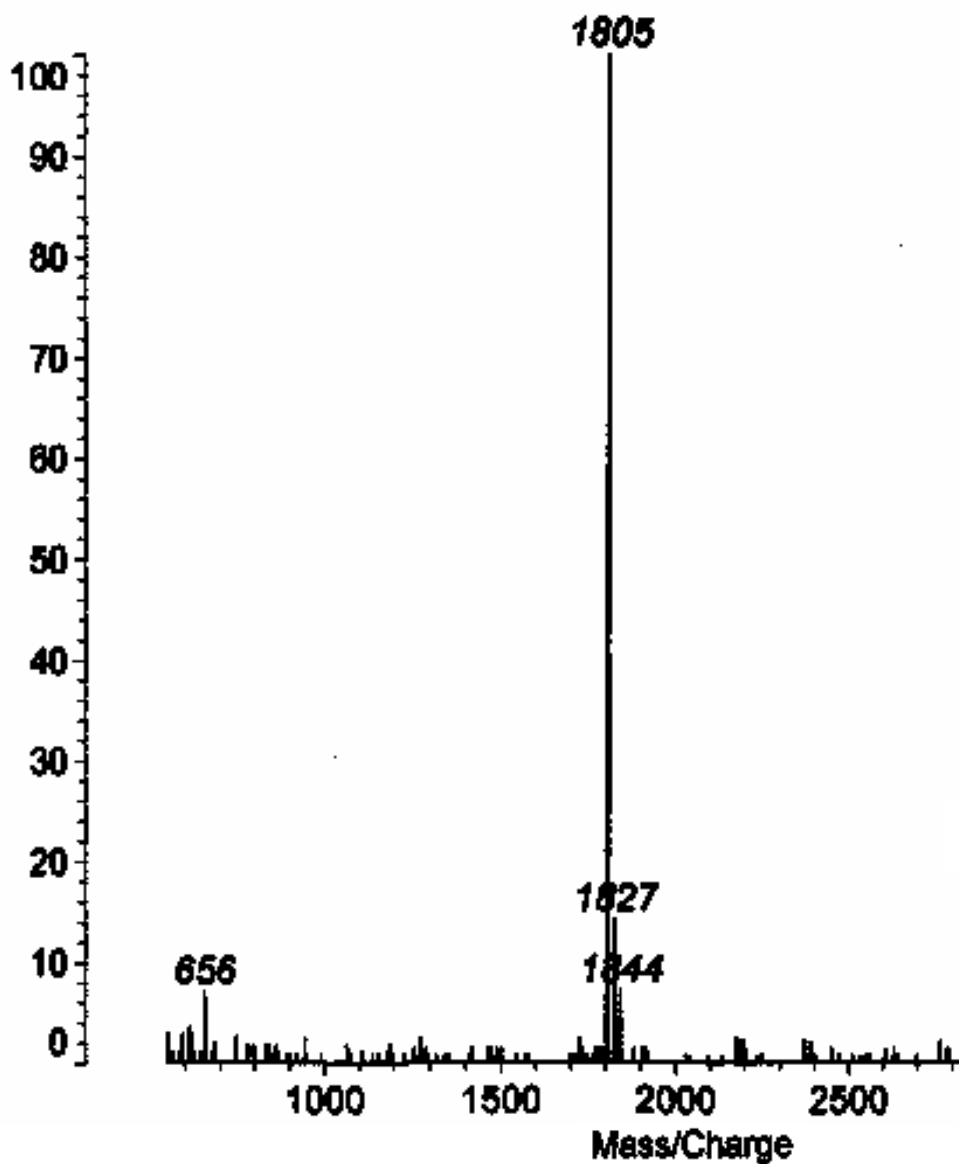

HPLC of peptide 5

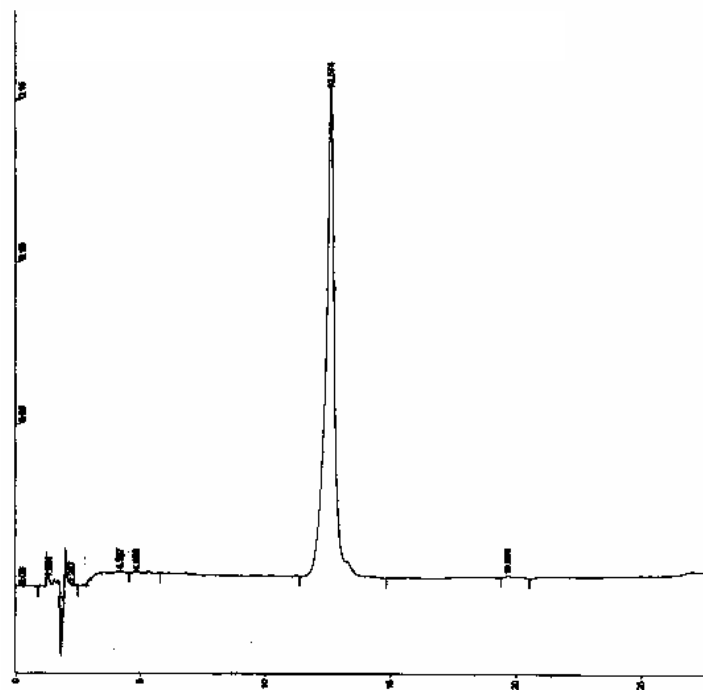

Time in mins

HPLC of peptide 6

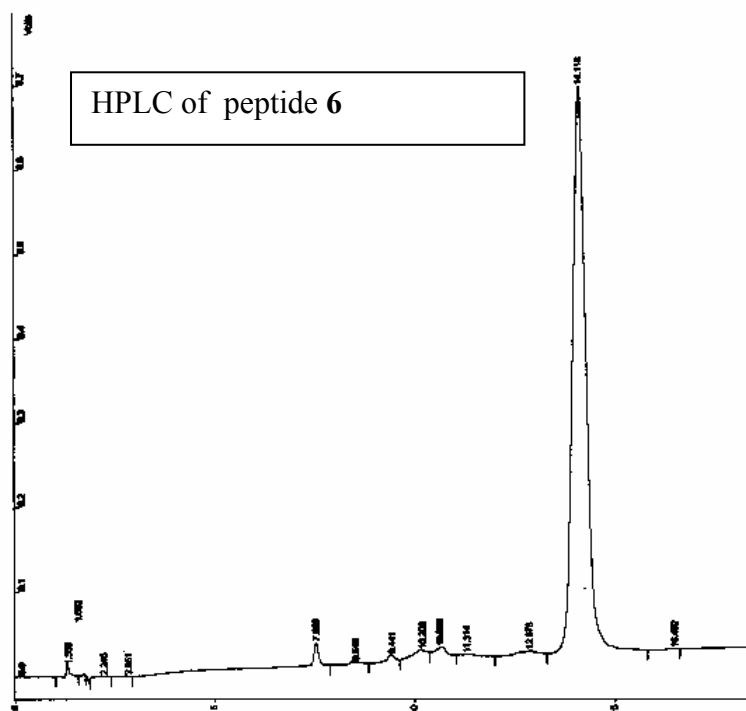

Time in mins

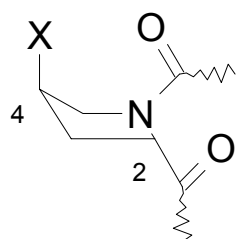

*cis-C4-endo*

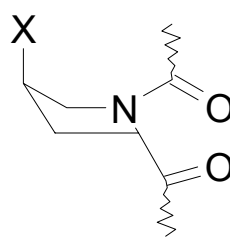

*trans-C4-endo*

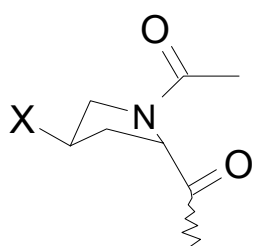

*cis-C4-exo*

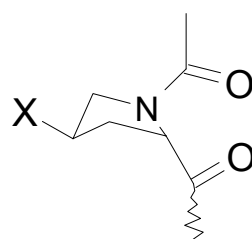

*trans-C4-exo*

**$R_{pn}$  values for the collagen peptides calculated from the CD spectra measured at 10 °C**

|                                                             | $R_{pn}$ values |        |        |         |
|-------------------------------------------------------------|-----------------|--------|--------|---------|
|                                                             | pH<br>3.0       | pH 7.0 | pH 9.0 | pH 12.0 |
| Ac-Phe.(Pro.Amp.Gly) <sub>6</sub> -NH <sub>2</sub> <b>9</b> | 0.17            | 0.15   | 0.09   | 0.17    |
| Ac-Phe(amp.Pro.Gly) <sub>6</sub> -NH <sub>2</sub> <b>7</b>  | 0.12            | 0.08   | 0.08   | -       |
| Ac-Phe(Amp.Pro.Gly) <sub>6</sub> -NH <sub>2</sub> <b>8</b>  | 0.08            | 0.08   | -      | -       |
